# Supplementary material
Source: PubMed Central journal article supplement (PMC2223259)

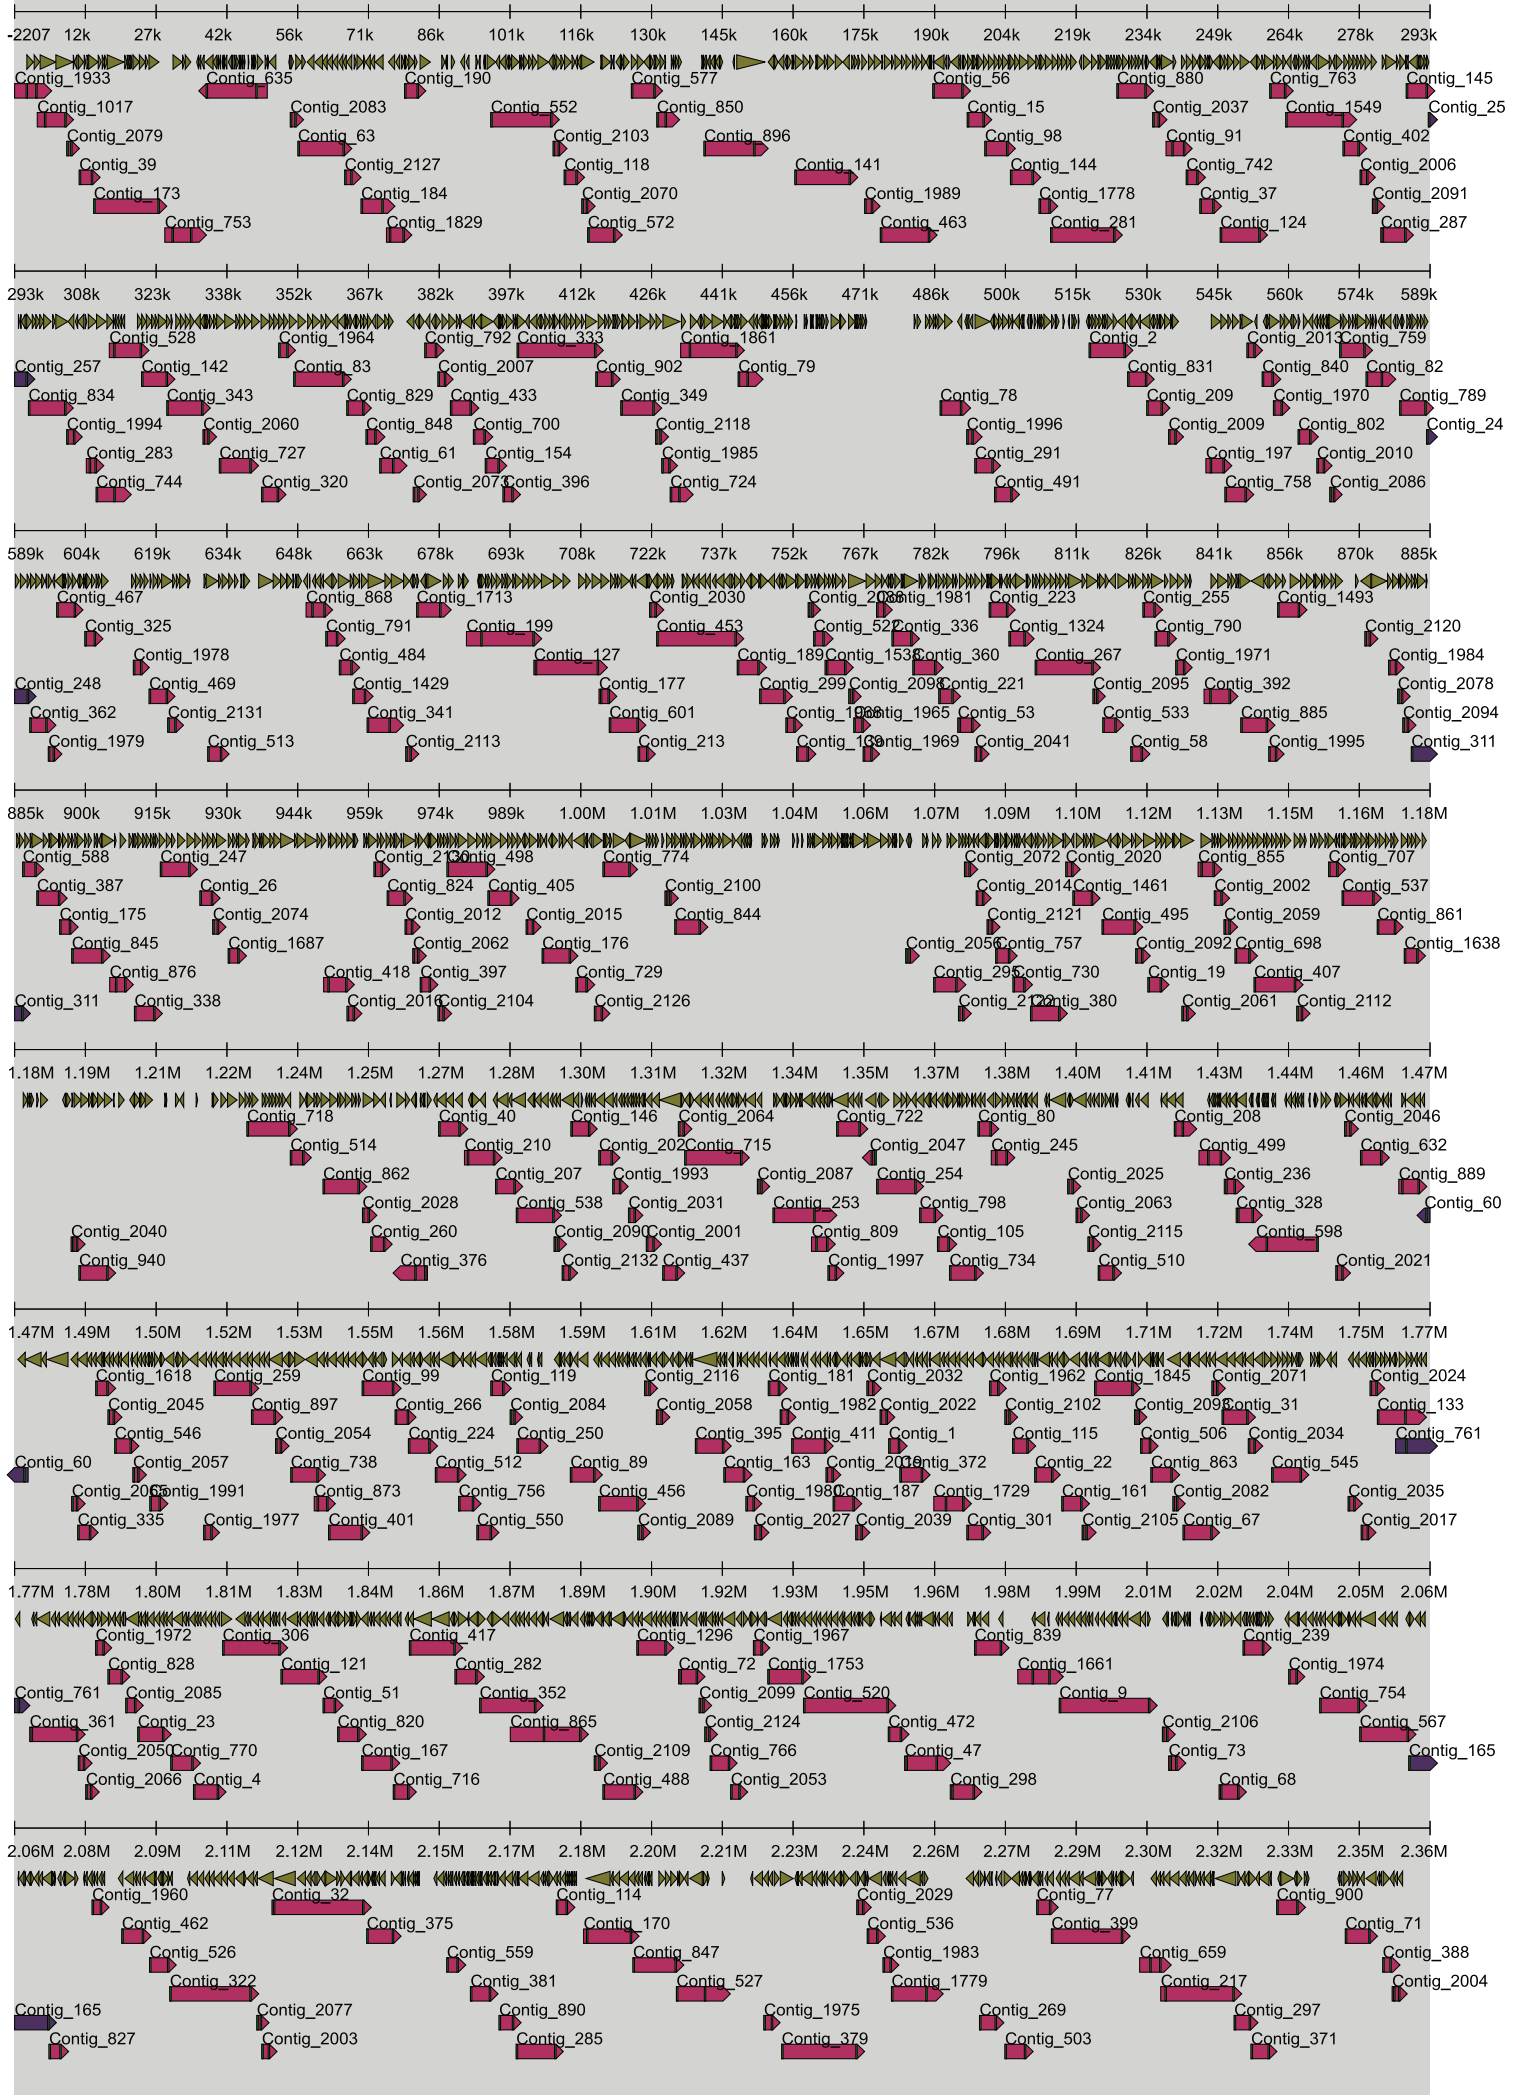

Supplement: aem_74_2_424__1.pdf [file aem_74_2_424__1.pdf]

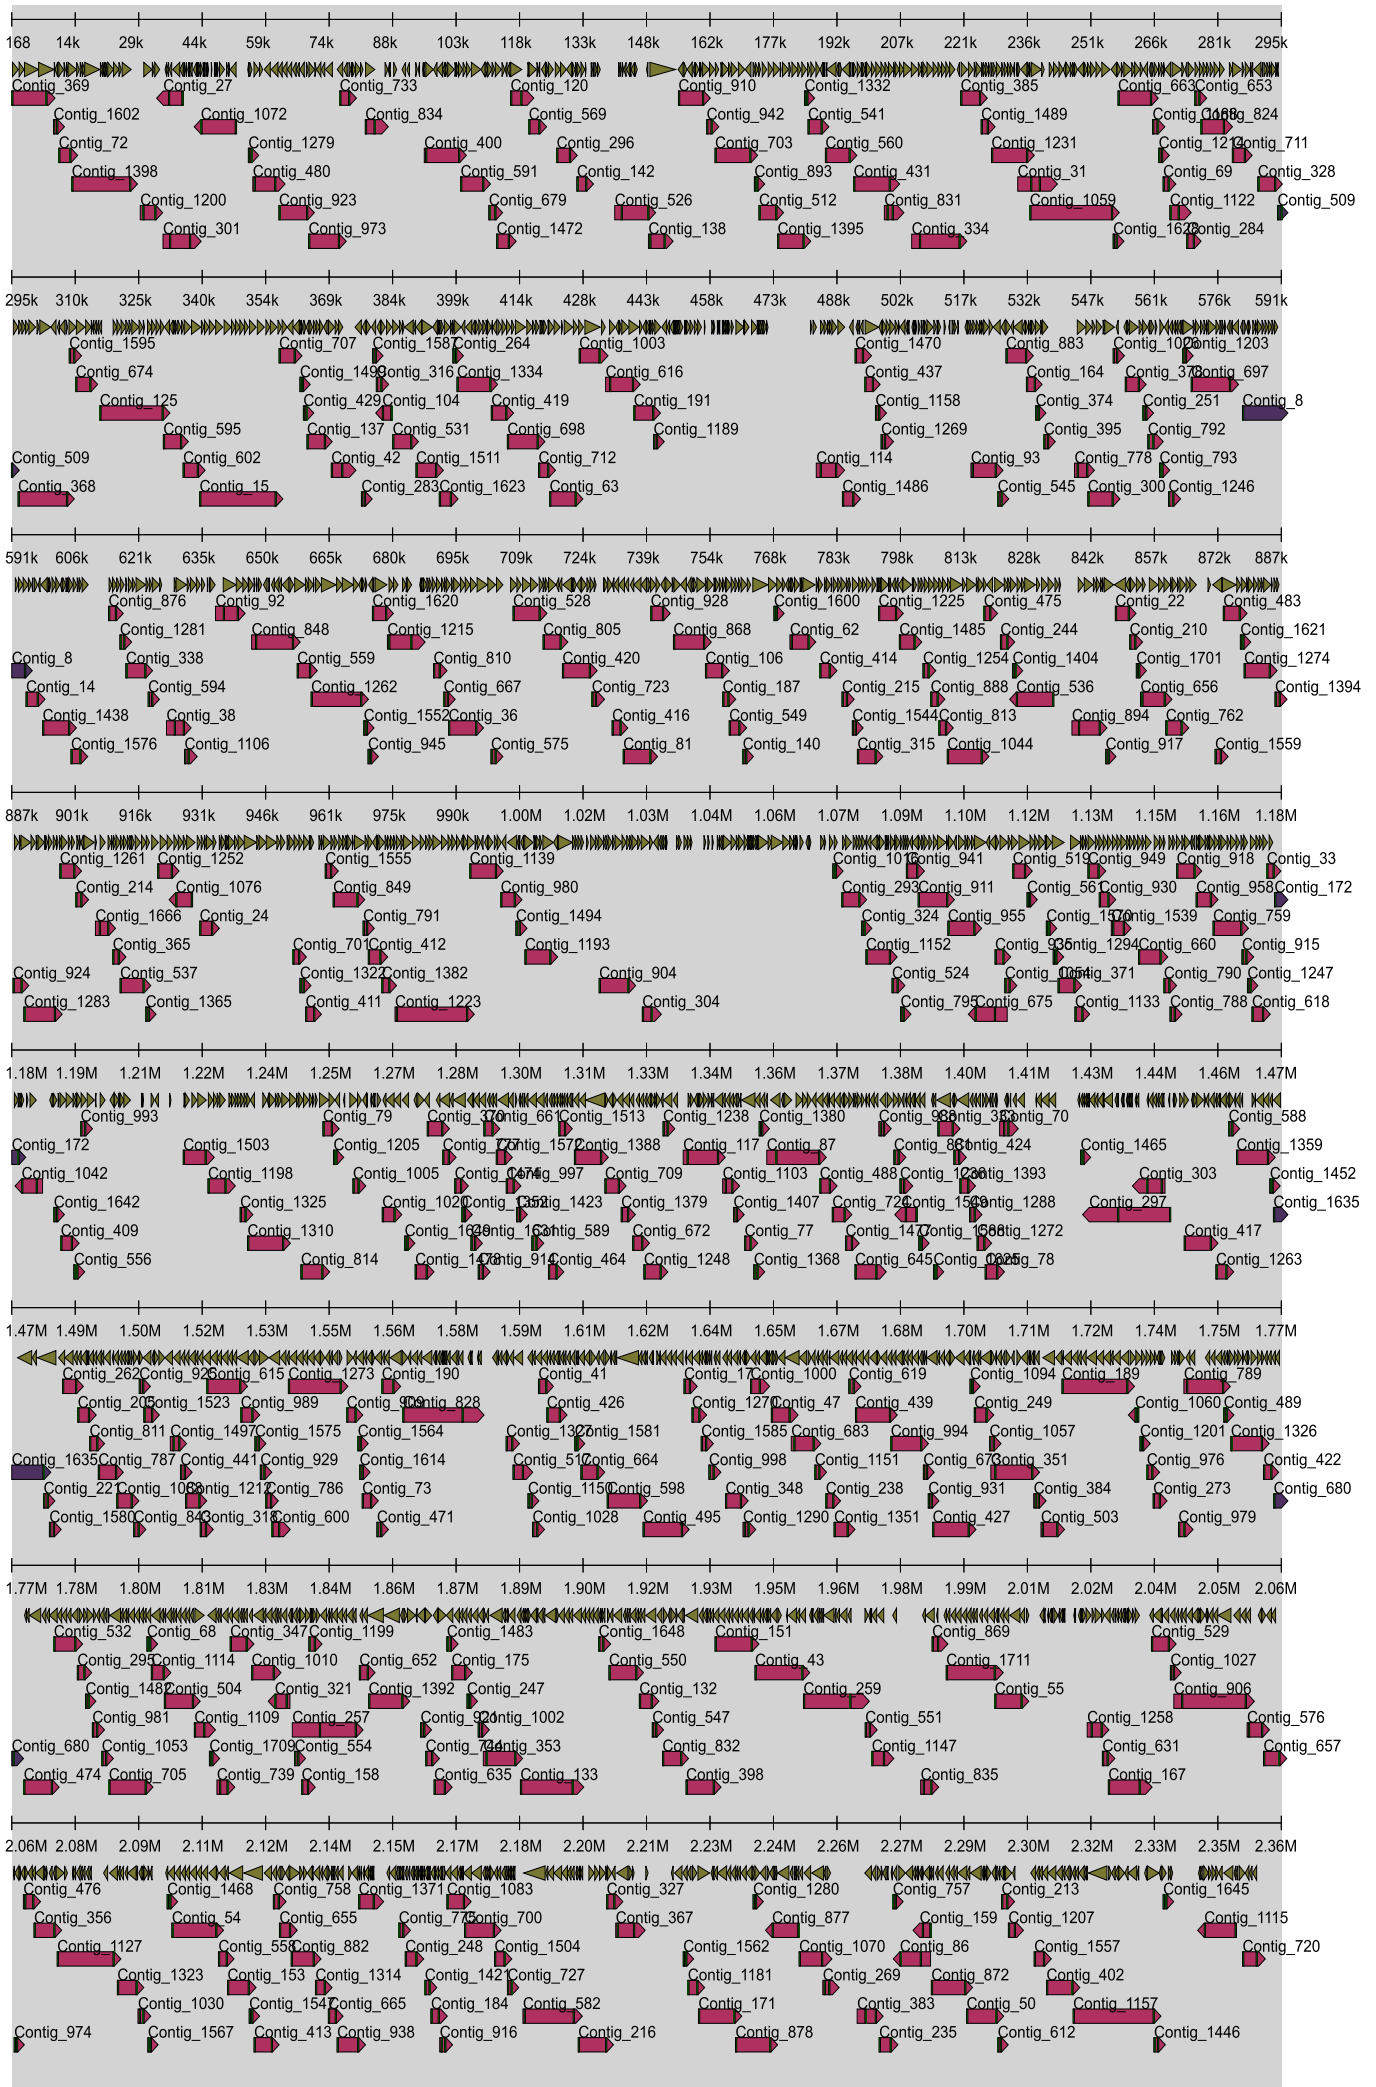

Supplement: aem_74_2_424__2.pdf [file aem_74_2_424__2.pdf]

# Supplementary figure S2

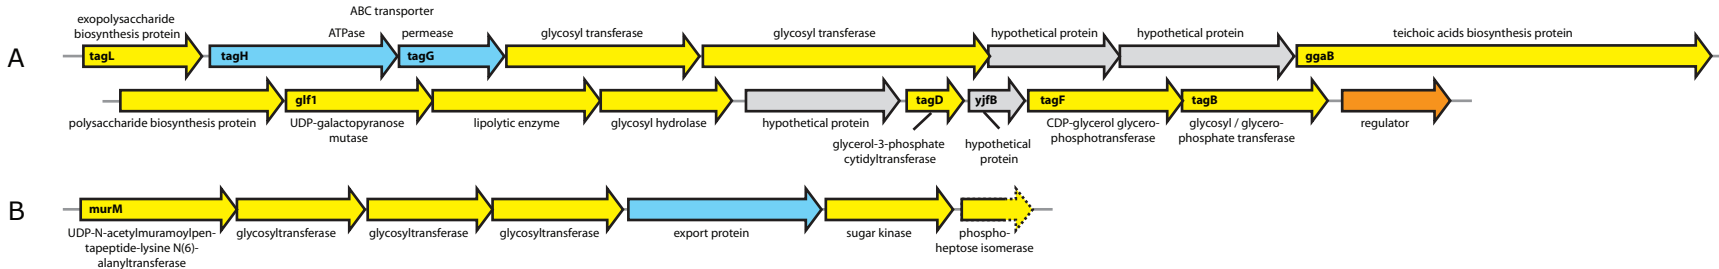

Supplement: aem_74_2_424__3.pdf [file aem_74_2_424__3.pdf]
